# Supplementary material
Source: PubMed Central journal article supplement (PMC4150396)
Supplement: Supp_Fig1.pdf [file Supp_Fig1.pdf]

## Supplementary Data

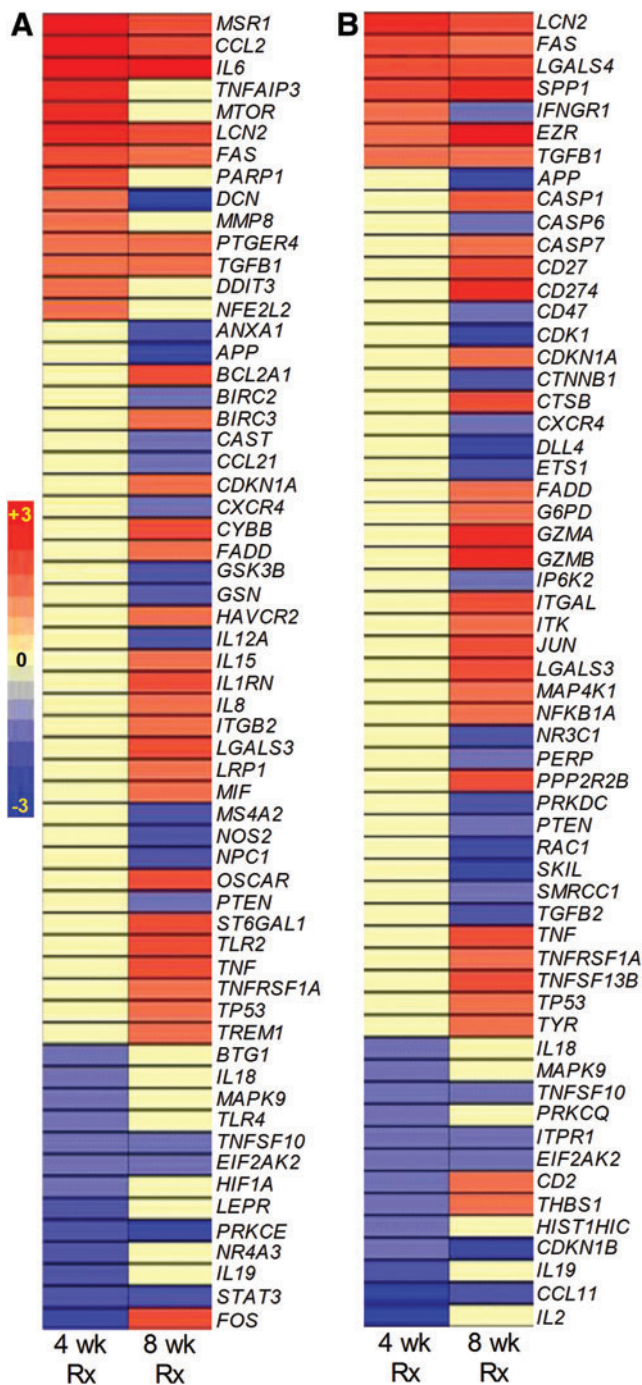

**SUPPLEMENTARY FIG. S1.** Intensity plot of cell necrosis (A) and cytotoxicity (B) network genes expression in etanercept-treated rabbit lungs. The values plotted are etanercept treated compared to untreated rabbits at 4 and 8 weeks of treatment. The color scale bar ranges from  $-3$  (blue; downregulation) to  $+3$  (red; upregulation) and the gradation in color corresponds to respective level of expression. Yellow color denotes no significant change between the untreated and etanercept-treated samples.
