# Supplementary material
Source: PubMed Central journal article supplement (PMC4150396)
Supplement: Supp_Table1.pdf [file Supp_Table1.pdf]

SUPPLEMENTARY TABLE S1. LIST OF OLIGONUCLEOTIDE PRIMERS USED IN THE QUANTITATIVE POLYMERASE CHAIN REACTION EXPERIMENTS

| <i>Gene</i>   | <i>Primer</i>      | <i>Sequence (5'→3')</i>                       | <i>Description</i>                       | <i>Gene ID</i> |
|---------------|--------------------|-----------------------------------------------|------------------------------------------|----------------|
| <i>ARG1</i>   | Forward<br>Reverse | GGCATCTACATCACAGAAGC<br>CTGTGTTACACGTTTCGAGTT | Arginase 1                               | 100008814      |
| <i>VCAM1</i>  | Forward<br>Reverse | CTGGAGGATGCAGGAGTGTA<br>GAGCACGAGAAGTTCAGGAG  | Vascular cell adhesion molecule 1        | 100008901      |
| <i>TIMP1</i>  | Forward<br>Reverse | AGACGGCCTTCTGCAACTCC<br>AACTCCTCGCTGCGGTTCTG  | Tissue inhibitor of metalloproteinase    | 100009047      |
| <i>CD28</i>   | Forward<br>Reverse | GGAGGTCTGTGTCTGTAATG<br>CCGTTGCTCTTCTCGTTGTC  | Cluster of difference 28                 | 100008998      |
| <i>IL13</i>   | Forward<br>Reverse | TCATCGAGGAGCTGGTCAAC<br>AGCCTTGCTGTGCAGAGTC   | Interleukin 13                           | 3596           |
| <i>SELL</i>   | Forward<br>Reverse | CTCAGAAGGAGCCGAGTTAA<br>TTTTGGTGTAGGACTGGACC  | Selectin L                               | 100009204      |
| <i>LGALS3</i> | Forward<br>Reverse | AGGGAAGAAAGGCAGACGAC<br>CATCATTGACCGCAACCTTG  | Lectin, galactoside-binding, soluble 3   | 100009187      |
| <i>TLR2</i>   | Forward<br>Reverse | CTCTCGCAGAACTTCGTCAA<br>AGAATGGCGGCGTCGTTGTT  | Toll-like receptor 2                     | 100009578      |
| <i>TNFA</i>   | Forward<br>Reverse | CTGAGTGACGAGCCTCTAGC<br>TTCATGCCGTTGGCCAGCAG  | Tumor necrosis factor, alpha             | 100009088      |
| <i>MMP1</i>   | Forward<br>Reverse | AATGGCTAAGGAAGGCCAAG<br>ATCAGGATGATGCGAGTGAC  | Matrix metalloproteinase,1               | 100009110      |
| <i>IL6</i>    | Forward<br>Reverse | ACTGGCGGAAGTCAATCTGC<br>CCTGAACCTGGCCTGAAGGT  | Interleukin 6                            | 100008733      |
| <i>NOS2</i>   | Forward<br>Reverse | AGAGACGCACAGGCAGAGGT<br>GCAGGCACACGCAATGATGG  | Nitric oxide synthase 2, inducible       | 100009437      |
| <i>SPP1</i>   | Forward<br>Reverse | TCTCCTAACACCGCAGAATG<br>TCTGTAAGCCACACTGTCAC  | Secreted phosphoprotein 1                | 100008982      |
| <i>CCL2</i>   | Forward<br>Reverse | TTCTGTGCCTGCTGCTCATA<br>GGACACTTGGTGCTGTTGAT  | Chemokine (C-C motif) ligand 2           | 100009130      |
| <i>CXCL10</i> | Forward<br>Reverse | CTGTACGCTGTACCTGTATC<br>GCAGTGGTCCATTCTCATCA  | Chemokine (C-X-C motif) ligand 10        | 100353112      |
| <i>MSR1</i>   | Forward<br>Reverse | AGGCGTTCCAGGTCCAGTAG<br>TCGGACAGTCGCAGAAGGAG  | Macrophage scavenger receptor 1          | 100009067      |
| <i>GAPDH</i>  | Forward<br>Reverse | GGCGTGAACCACGAGAAGTA<br>TCCACAATGCCGAAGTGGTC  | Glyceraldehyde-3-phosphate dehydrogenase | 100009074      |
